# Supplementary material for: Origin and mechanism of thermal insensitivity in mole hemoglobins: a test of the ‘additional’ chloride binding site hypothesis
Source: Oxford University Press journal article supplement (doi:10.1242/jeb.063669), 2012-01-12
Supplement: jeb063669tables1.pdf [file jeb063669tables1.pdf]

Table S1. Primers used in the amplification and sequencing reactions of  $\alpha$ - and  $\beta$ -like ( $\delta$ ) globin genes of star-nosed and American shrew moles.

| Primer name      | Sequence                                           |
|------------------|----------------------------------------------------|
| Invitrogen-AP    | 5' - GGCCACGCGTCGACTAGTACTTTTTTTTTTTTTTTTTTTT - 3' |
| Invitrogen-AP(G) | 5' - GGCCACGCGTCGACTAGTACGGGIIGGGIIGGGIIG - 3'     |
| MoleHBA-F        | 5' - AACATCAAGGCCGCCTGG - 3'                       |
| MoleHBA-FN       | 5' - ACCACCAAGACCTACTTC - 3'                       |
| MoleHBA-R        | 5' - GCTTAACGGTACTTGGAGGTCAG - 3'                  |
| MoleHBA-RN       | 5' - GGTCAGCACGGTGCTCACGG - 3'                     |
| MoleHBB-F        | 5' - TGGACCCAGAAGTTCTTTGACAG - 3'                  |
| MoleHBB-FN       | 5' - GGTTGTCTACCCCTGGAC - 3'                       |
| MoleHBB-R        | 5' - GTACTTGTGAGCCAGGGCAGY - 3'                    |
| MoleHBB-RN       | 5' - TTCTCGGGATCCACGTGC - 3'                       |
| M-13('F)-40      | 5' - GTTTTCCCAGTCACGAC - 3'                        |
| M-13('R)         | 5' - AACAGCTATGACCATG - 3'                         |
