# Supplementary figures and images for: Origin and mechanism of thermal insensitivity in mole hemoglobins: a test of the ‘additional’ chloride binding site hypothesis
Source: Oxford University Press journal article supplement (doi:10.1242/jeb.063669), 2012-01-12

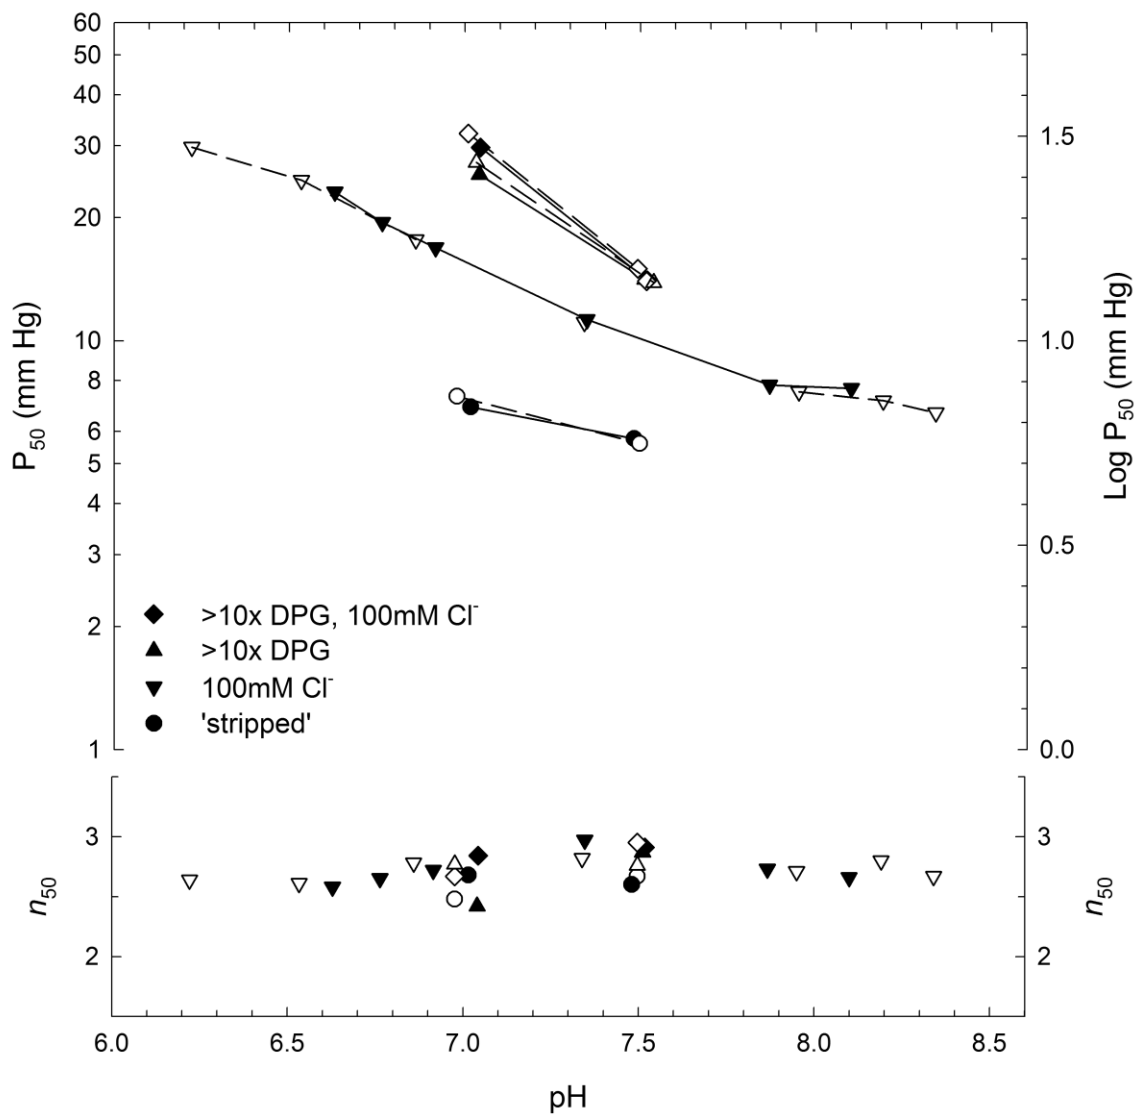

Supplement: jeb063669figs1.pdf [file jeb063669figs1.pdf]
